# Supplementary material
Source: HighWire-hosted journal article supplement (https://svn.bmj.com/content/3/2/107)
Supplement: inline-supplementary-material-2 [file inline-supplementary-material-2.docx]

**Supplemental Figure 1**. Flow chart for selection of published eligible studies from November 2012 to May 2018.

**Supplemental Table 1**. Sensitivity Analyses for Efficacy and Safety Outcomes (Dual Antiplatelet Versus monotherapy)

| Outcome | Studies | Patients | Risk Ratio (95% CI) | *P* value | I2,% |
| --- | --- | --- | --- | --- | --- |
| Stroke recurrence | 9 | 13089 | 0.72(0.63-0.81) | ＜0.001 | 0 |
| Composite vascular events | 7 | 12652 | 0.73(0.65-0.82) | ＜0.001 | 0 |
| Major bleeding | 7 | 12887 | 1.89(1.15-3.10) | 0.01 | 0 |
